# Supplementary material for: Computational Simulation Model to Predict Behavior Changes in Inflammatory Bowel Disease Patients during the COVID-19 Pandemic: Analysis of Two Regional Japanese Populations
Source: MDPI journal article supplement (doi:10.3390/jcm12030757), 2023-01-18
Supplement: s1 [file s1]

## SUPPLEMENTAL MODEL METHODOLOGY

### S1.) Behavior Predictor Synthetic Population

#### S1A.) Synthetic Population Localization to Japanese Data

The Behavior Predictor synthetic population contains 90,000 synthetic agents created by aggregating US data on care utilization, health conditions, behaviors, information and content preferences, product choices and usage, and motivators and stressors. These data were collected from a combination of consumer, geospatial, and behavioral surveillance data via statistical matching algorithms. Using linear programming, sample weights were calculated for each synthetic agent so that in aggregate the statistics of the synthetic population match the population data from the Japanese Ministry of Health, Labor and Welfare (MHLW) Health Statistics Office for 2016. Separate sample weight calculations were performed for Tokyo and Hokkaido. As shown in Table S1, errors were on the order of  $10E-8$  to  $10E-10$ , indicating a close fit to the population data.

Table S1: Synthetic population fit for Tokyo and Hokkaido, data fields, population average values, and fitting errors

| Constraint_Name              | Tokyo Population Data (percent adult population) | Tokyo Synthetic Population Fit Errors (percent) | Hokkaido Population Data (percent adult population) | Hokkaido Synthetic Population Fit Errors (percent) |
|------------------------------|--------------------------------------------------|-------------------------------------------------|-----------------------------------------------------|----------------------------------------------------|
| MALE BMI OVERWEIGHT          | 0.13328659                                       | 7.17E-09                                        | 0.19333879                                          | 7.66E-09                                           |
| FEMALE BMI OVERWEIGHT        | 0.10388946                                       | 1.35E-08                                        | 0.13664278                                          | 2.36E-08                                           |
| MALE BMI UNDERWEIGHT         | 0.02050563                                       | 2.95E-09                                        | 0.01708803                                          | 8.27E-09                                           |
| FEMALE BMI UNDERWEIGHT       | 0.03224156                                       | 2.61E-09                                        | 0.04401228                                          | 1.09E-08                                           |
| MALE BMI NORMAL WEIGHT       | 0.33443705                                       | 3.67E-09                                        | 0.27780246                                          | 1.03E-08                                           |
| FEMALE BMI NORMAL WEIGHT     | 0.37563971                                       | 2.61E-09                                        | 0.33111566                                          | 6.73E-09                                           |
| MALE NORMAL BLOOD PRESSURE   | 0.2472047                                        | 3.85E-10                                        | 0.19032667                                          | 4.29E-09                                           |
| FEMALE NORMAL BLOOD PRESSURE | 0.18346498                                       | 6.26E-09                                        | 0.14517743                                          | 2.46E-08                                           |
| MALE SMOKER EVERYDAY         | 0.1339792                                        | 3.36E-09                                        | NA                                                  | NA                                                 |
| FEMALE SMOKER EVERYDAY       | 0.04127183                                       | 3.23E-09                                        | NA                                                  | NA                                                 |
| MALE SMOKER SOMETIMES        | 0.00908334                                       | 2.27E-09                                        | NA                                                  | NA                                                 |
| FEMALE SMOKER SOMETIMES      | 0.00825437                                       | 6.57E-10                                        | NA                                                  | NA                                                 |
| MALE SMOKER FORMER           | 0.06358335                                       | 8.57E-09                                        | 0.20074171                                          | 3.39E-09                                           |
| FEMALE SMOKER FORMER         | 0.02063592                                       | 4.93E-08                                        | 0.07803315                                          | 2.40E-08                                           |
| MALE NON SMOKER              | 0.2815834                                        | 1.59E-09                                        | 0.12353336                                          | 6.51E-09                                           |
| FEMALE NON SMOKER            | 0.44160861                                       | 1.86E-09                                        | 0.37392536                                          | 7.20E-09                                           |

|                                 |            |          |            |          |
|---------------------------------|------------|----------|------------|----------|
| MALE NO ALCOHOLIC DRINKING      | 0.18308598 | 1.57E-09 | 0.17335677 | 3.91E-09 |
| FEMALE NO ALCOHOLIC DRINKING    | 0.32811107 | 8.37E-10 | 0.34941588 | 3.62E-10 |
| MALE NO REGULAR DENTIST VISIT   | 0.27931256 | 7.83E-10 | 0.07128147 | 3.15E-09 |
| FEMALE NO REGULAR DENTIST VISIT | 0.1981048  | 2.56E-09 | 0.04759468 | 6.32E-10 |
| MALE DIAGNOSED DIABETES         | 0.07909314 | 1.12E-09 | 0.2332     | 7.41E-09 |
| FEMALE DIAGNOSED DIABETES       | 0.09723644 | 2.43E-09 | 0.2653     | 5.20E-09 |
| MALE NO DAILY EXERCISE          | 0.2332     | 2.29E-09 | 0.2557     | 1.45E-09 |
| FEMALE NO DAILY EXERCISE        | 0.2653     | 1.17E-09 | 0.2326     | 2.15E-09 |
| FAMILY SIZE 1                   | 0.13       | 1.33E-09 | 0.13       | 2.70E-09 |
| FAMILY SIZE 2                   | 0.87       | 1.98E-10 | 0.87       | 4.03E-10 |
| EMPLOYED                        | 0.421855   | 5.40E-10 | 0.421855   | 2.04E-10 |
| UNEMPLOYED                      | 0.173145   | 5.44E-09 | 0.173145   | 1.36E-08 |
| Age 21-29                       | 0.13333333 | 2.44E-09 | 0.13333333 | 7.57E-09 |
| Age 30-39                       | 0.1769697  | 1.34E-09 | 0.1769697  | 4.63E-09 |
| Age 40-49                       | 0.16363636 | 9.15E-10 | 0.16363636 | 2.64E-09 |
| Age 50-59                       | 0.15878788 | 1.39E-09 | 0.15878788 | 2.29E-09 |
| Age 60-69                       | 0.1769697  | 2.44E-09 | 0.1769697  | 5.41E-09 |
| Age 70-79                       | 0.12242424 | 1.00E-09 | 0.12242424 | 1.44E-09 |
| Age 80+                         | 0.06787879 | 3.18E-09 | 0.06787879 | 1.07E-08 |

### S1B.) Synthetic Population IBD Severity Index

In addition to the explicit data present in the Behavior Predictor synthetic population data on diagnosis of ulcerative colitis (UC) and Crohn disease (CD), an IBD Severity Index was created and evaluated for each patient agent. The necessity for this additional index was to identify agents in the patient pool who had not been diagnosed with IBD to date but who were at risk of becoming symptomatic during the future course of the simulation.

The IBD Severity Index was based on existing published indices for IBD [1,2] but modified to use the factors present in the Behavior Predictor data (see Table S2). For this reason, the index is not a rigorous measure of IBD risk but a qualitative way of identifying those patients most at risk for becoming symptomatic.

IBD Severity Index = sum(Severity Factor weights if present in a patient)

Table S2: IBD Severity Index, including factors and weights

| Severity Factor          | Weight        |
|--------------------------|---------------|
| Bowel / colon cancer     | 0.05305039788 |
| Stress                   | 0.05305039788 |
| Trouble falling asleep   | 0.05305039788 |
| No or little exercise    | 0.05305039788 |
| Smoking                  | 0.6551724138  |
| Low fat                  | 0.05305039788 |
| High protein             | 0.05305039788 |
| Gastroenterologist visit | 0.02652519894 |

### S1C.) Inclusion of Synthetic Japanese IBD Patient Agents in Simulation Model

When the simulation model was initialized, the full synthetic population of patient agents were read in as data, including their patient ID, age, sex, severity, UC/CD status, and sample weights. At the start of a simulation, the patient agent pool was initialized by introducing randomly selected patients from the general synthetic population, including their sample weights. This was repeated until the sum of the patient pool sample weights equaled or exceeded the required patient pool population size at the start of the model. During the simulation model run, when the patient growth module indicated that new symptomatic patients were seeking care, new patients were introduced into the patient agent pool, and a similar process was followed to select new patients.

In this model, each patient agent represented a different number of real patients determined by their sample weight, as solved for in the fit to the MHLW Japanese population data (described in Section S1A).

## S2.) Demand Simulator Agent-Based Patient Simulation Model

### S2A.) Model Description

The model is an agent-based simulation model with a hierarchical structure (see Figure S1.). At the highest level it is a system dynamics model composed of a series of first order, possibly nonlinear, differential equations that numerically simulate the size of the IBD population forward in time using exogenously specified COVID-19 disruptions. The system dynamics model is numerical time stepped using an adaptive time stepped Runge-Kutta method.

Below this level is a discrete event model that is run in parallel to the system dynamics model. This discrete event model consists of a series of statecharts describing an agent's (also referred to here as a patient) trajectory through the treatment pathway. Many copies of this model are run simultaneously, one for each patient in the population. Information about the growth in population, which determines the introduction of new patients, and the current state of a disruptions' effect on healthcare supply and patient demand are communicated from the system dynamics model down to the patient discrete event models.

The model is presented in pseudocode as it is natively an algorithmic computational model. While the model can be expressed as formal mathematical expressions, the authors believe that presenting the description of the model in pseudocode is more efficient and makes the underlying processes of the model easier to comprehend.

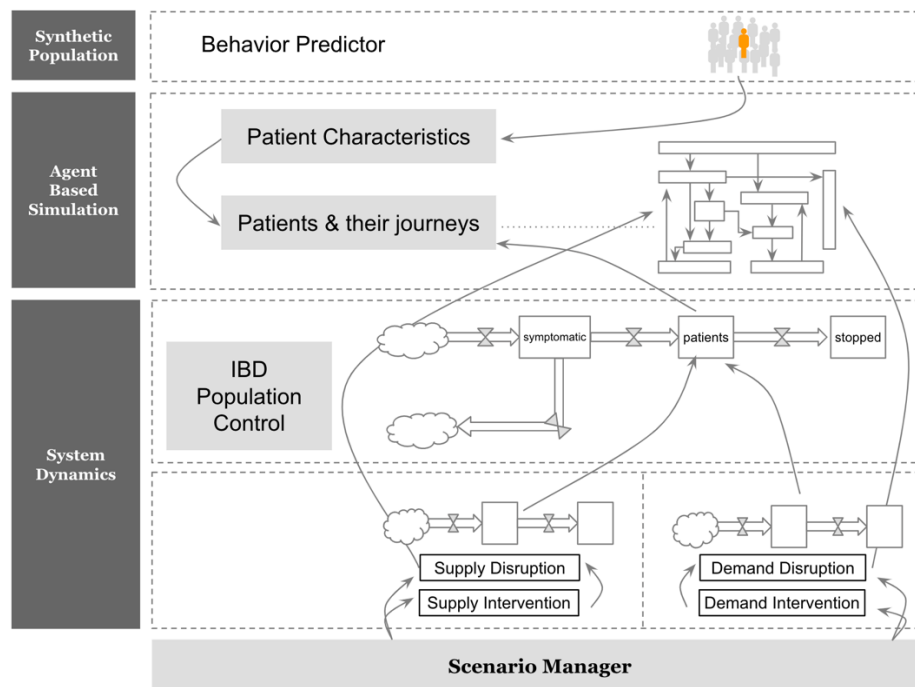

Figure S1: Schematic representation of the hierarchical model integration of the Behavior Predictor synthetic population, agent-based patient discrete event model, and population level system dynamics model.

Separate full versions of the model, including separate synthetic populations and calibrated parameters, were developed for Tokyo and Hokkaido. Both models were run for all scenarios and insights regarding the different responses to the COVID-19 pandemic in Tokyo and Hokkaido can be drawn from the differences in the model responses.

The simulation model explicitly represents the influence of disruptions, mainly the spread of the COVID-19 through Tokyo and Hokkaido, but it also supports other types of disruptions such as earthquakes and financial crises. While the response to the model has been rigorously calibrated to relevant COVID-19 pandemic data, the representation of other disruptions is largely idealized and qualitative. To represent the COVID-19 disruption more realistically, interventions to mitigate the intensity of the pandemic have also been included.

These include:

1. National confidence building
2. System social signaling
3. Physician outreach
4. Emergency response infrastructure
5. Barrier elimination
6. Simple navigation assistance

The details of these interventions are discussed in the main text in Section S2.4, Interventions to Address the Impact of Disruptions.

## S2B.) Calibration

The full model was calibrated using a steepest descent (gradient descent) method with claims data from JMDC as described in the main text. There were two calibrations performed: one prior to the onset of COVID-19 in Japan running from 2008 to 2018, and a second during the first months of the COVID-19 pandemic in Japan that JMDC had data available for. The Tokyo and Hokkaido models were calibrated separately and have separate sets of parameters.

The following list of claims data from JMDC used to calibrate the model:

1. New patients
2. Visits
3. Procedures
4. Number of IBD treatments
5. Vedolizumab prescriptions for UC
6. Vedolizumab prescriptions for CD

A list of parameters that were calibrated to these data during either the historical (2008-2019) or COVID-19 era data can be found in Section S2E, Model Definitions, of this document.

## S2C.) System Dynamics Model Equations and Pseudocode

### IBD Population Dynamics

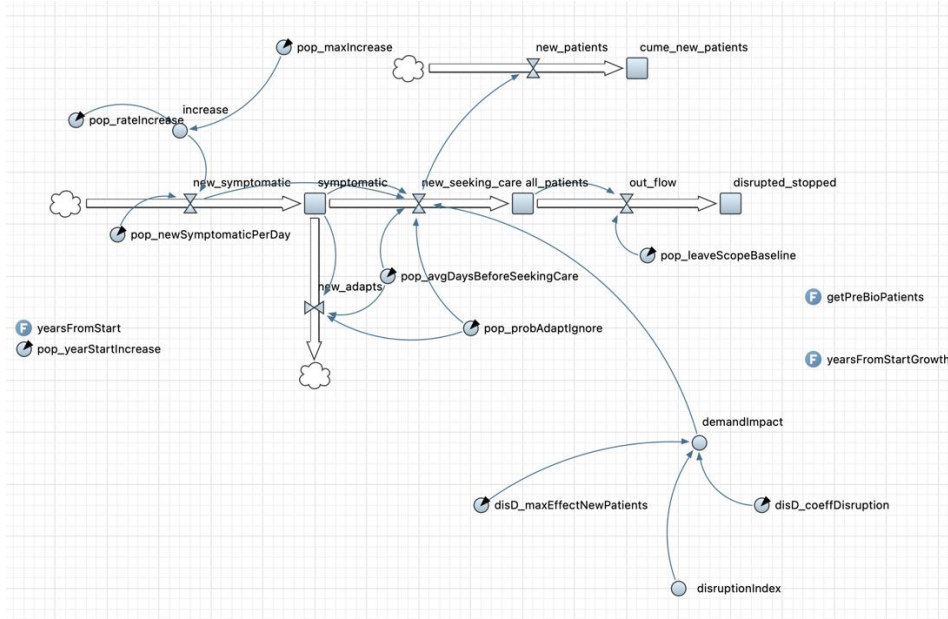

$$\Delta \text{asymptomatic} / \Delta t = + \text{new\_symptomatic} - \text{new\_seeking\_care} - \text{new\_adapts}$$

$$\Delta \text{all\_patients} / \Delta t = + \text{new\_seeking\_care} - \text{out\_flow}$$

$$\Delta \text{disrupted\_stopped} / \Delta t = + \text{out\_flow}$$

$$\Delta \text{cume\_new\_patients} / \Delta t = \text{new\_patients}$$

$$\text{new\_symptomatic} = \text{pop\_newSymptomaticPerDay} * (1 + (\text{pop\_maxIncrease} * 10) * (1 - 1 / \exp(\text{pop\_rateIncrease} * \text{yearsFromStart})))$$

$$\text{new\_adapts} = (\text{asymptomatic} * \text{pop\_probAdaptIgnore}) / \text{pop\_avgDaysBeforeSeekingCare}$$

```

new_seeking_care = delay3(new_symptomatic * demandImpact,
pop_avgDaysBeforeSeekingCare, (symptomatic / pop_avgDaysBeforeSeekingCare))
* (1.0-pop_probAdaptIgnore)

out_flow = all_patients * (pop_leaveScopeBaseline/10000)

new_patients = new_seeking_care

```

where delay3(input, delay time, initial value) is a third order exponential delay of the input.

### ***Growth in Patients, Procedures, and Visits***

In addition to the increase in the IBD population over time, the number of visits and services received by each patient also increased over time. To represent this, an additional growth term is included.

```

updateBioDueToGrowth()
//if bio to start is greater than bio started, then create growth
newBiosToday = new_bio_patients - bioStarted
createdToday = 0.0

//loop through until we have created enough people
while createdToday < newBiosToday
    Pick a random Patient in pre-biologic treatment
    For that Patient, Generate message: "Start Bio"
    createdToday = createdToday + the Patient's population sample weight

//update bioStarted to include the people we created today
bioStarted = bioStarted + createdToday

yearsFromStartGrowth()
//returns number years from 1975 that the model has been running

growthProcs = (growthProcs_maxIncrease) * (1-
1/exp(growthProcs_rateIncrease*yearsFromStartGrowth(growthProcs_year)))

growthVisits = (growthVisits_maxIncrease) * (1-
1/exp(growthVisits_rateIncrease*yearsFromStartGrowth(growthVisits_year)))

growthBio = (growthBio_maxIncrease/8000) * (1-
1/exp(growthBio_rateIncrease*yearsFromStartGrowth(growthBio_year)))

if growthBio > 0
then updateBioDueToGrowth()

Anew_bio_patients /Δt = growthBio*m_treatment_pre_biologic

m_treatment_pre_biologic = number of patients in pre-biologic treatment multiplied
by their sample weights

```

### ***Disruption Dynamics***

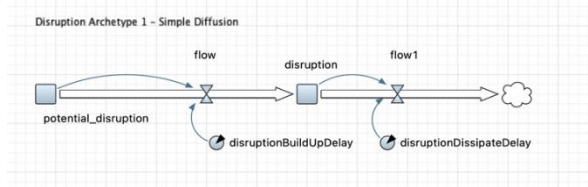

$$D(\text{potential\_disruption})/\Delta t = -\text{potential\_disruption} / \text{disruptionBuildUpDelay}$$

$$\Delta(\text{disruption})/\Delta t = (\text{potential\_disruption} / \text{disruptionBuildUpDelay}) - (\text{disruption} / \text{disruptionDissipateDelay})$$

## Supply Dynamics

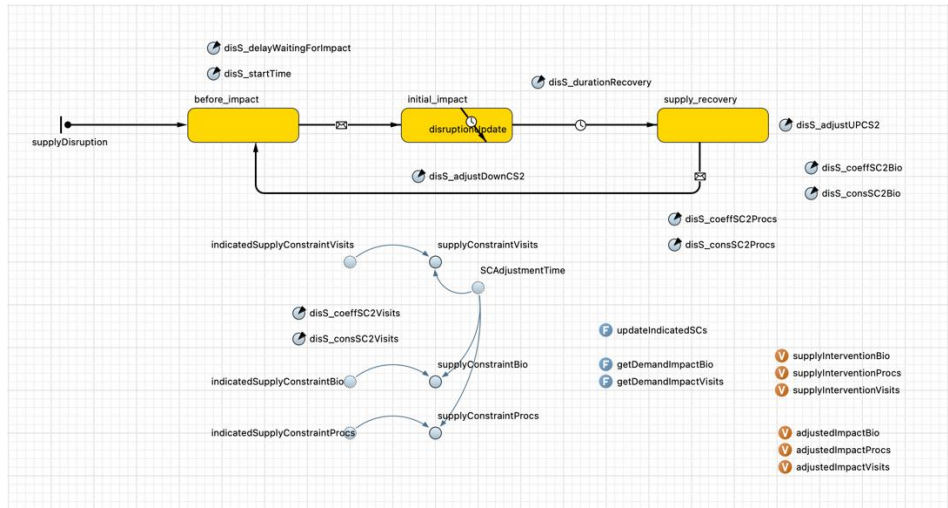

### before\_impact

```
indicatedSupplyConstraintVisits = 1
indicatedSupplyConstraintBio = 1
indicatedSupplyConstraintProcs = 1
SCAdjustmentTime = 1.0
```

```
if simTime == disS_startTime + disS_delayWaitingForImpact
then generate message "Start Supply Disruption"
```

Transition on message: "Start Supply Disruption"

### initial\_impact

```
//Time to reach max impact
SCAdjustmentTime = disS_adjustDownCS2
```

```
//Update supply constraints
```

```
indicatedSupplyConstraintVisits = 1 - (1 - exp(disS_consSC2Visits -
disS_coeffSC2Visits*disruption))
/(1+exp(disS_consSC2Visits - disS_coeffSC2Visits*disruption))
*supplyInterventionVisits
```

```
indicatedSupplyConstraintBio = 1 - (1 - exp(disS_consSC2Bio -
disS_coeffSC2Bio*disruption))
/(1+exp(disS_consSC2Bio - disS_coeffSC2Bio*disruption))
```

```

*supplyInterventionBio

indicatedSupplyConstraintProcs = 1 - (1 - exp(disS_consSC2Procs -
disS_coeffSC2Procs*disruption)
/(1+exp(disS_consSC2Procs - disS_coeffSC2Procs*disruption)))
*supplyInterventionProcs

transitionTime = disS_durationRecovery

supply_recovery
indicatedSupplyConstraintVisits = 1
indicatedSupplyConstraintBio = 1
indicatedSupplyConstraintProcs = 1
SCAdjustmentTime = disS_adjustUPCS2
supplyInterventionBio = 1.0
supplyInterventionProcs = 1.0
supplyInterventionVisits = 1.0

if simTime == disS_startTime + disS_delayWaitingForImpact
+ disS_durationRecovery + disS_recoveryTime
then generate message "Return to before impact"

Transition on message: "Return to before impact"

supplyConstraintVisits = smooth3(indicatedSupplyConstraintVisits,SCAdjustmentTime,1)
supplyConstraintBio = smooth3(indicatedSupplyConstraintBio,SCAdjustmentTime,1)
supplyConstraintProcs = smooth3(indicatedSupplyConstraintProcs,SCAdjustmentTime,1)

```

## ***Demand Dynamics***

```

demandImpact = 1.0 - disD_maxEffectNewPatients * (1 - 1 / exp(disD_coeffDisruption
* disruption))

disD_maxEffectNewPatients = disD_maxEffectNewPatients * demandInterventionPatients
disD_maxDemandBio = disD_maxDemandBio * demandInterventionBio
disD_maxDemandVisits = disD_maxDemandVisits * demandInterventionVisits

```

## **S2D.) Patient Level Discrete Event Model**

Below the population-level system dynamics model, there is a parallel patient-level discrete event model that runs for each patient agent in the patient pool. This discrete event model consists of five submodels (statecharts) that the patients progress through and run in parallel (see Figure S2). The five submodels are as follows:

1. State of disease condition
2. State of continuous care
3. State of treatment: high level
4. State of treatment: vedolizumab
5. State of treatment: competitor biologic

Each is described with a diagram of event flow and pseudocode including a set of common functions that are used across the submodels.



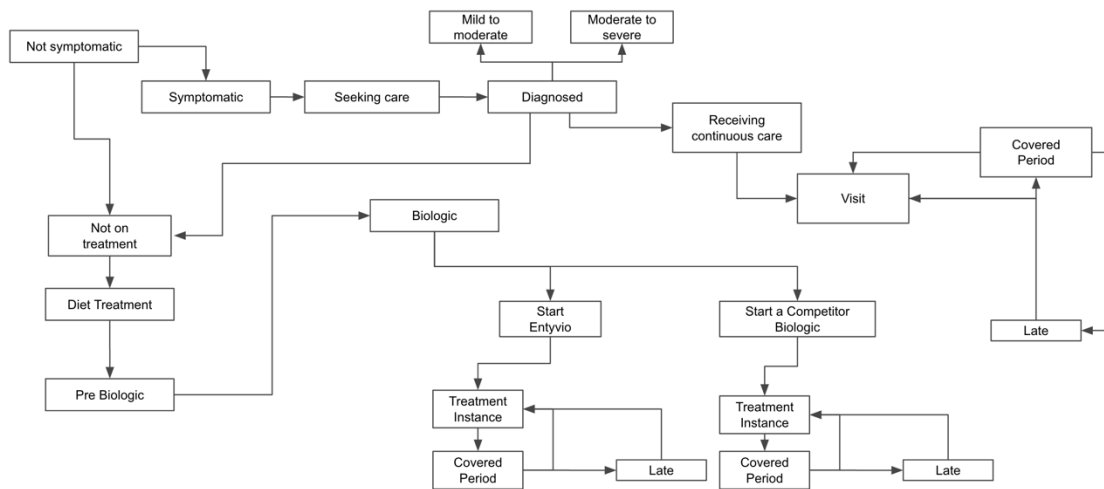

Figure S2: Schematic representation of patient-level discrete event submodels and their interdependencies

### Patient-Level Discrete Event Model Common Functions

```

getDisruptionEffect(maxEffect,coeff) = 1.0 - maxEffect * (1 - 1 / exp(coeff
    * disruption))

updateSeverityStatus()
    severity = BPTwin.severity
    severityAdjusted = (severity - config_severityThreshold) * (1.0 / (1.0 -
        config_severityThreshold))
    probSevere = 0.0;

    if (severityAdjusted > p_severitySevereThreshold)
    then probSevere = (random() * 0.1) + 0.9

    severe = randomTrue(probSevere)

    if severe == true
    then isSevere = true

performProcedures(isDiagnosis)
    growth = 1.0

    if (!isDiagnosis)
    then growth = (1 + growthProcs)

    disruptionSupplyImpact = 1.0 - max(supplyConstraintProcs, 0.0);
    disruptionDemandImpact = 1.0 - max(getDisruptionEffect(disD_maxDemandVisits,
        disD_wDemandVisits), 0.0);
    disruptionImpact = 1.0 - (disruptionSupplyImpact + disruptionDemandImpact);

    //Update the values by procedure type

    if isDiagnosis == True //get procedures incurred during diagnosis
        scopesToday = p_procsPerDiagnosis * procedureShare_SCOPES* growth
    else //if not diagnosis, then it's a normal visit
        scopesToday = p_procsPerVisit * procedureShare_SCOPES* growth

    scopesToday = scopesToday *disruptionImpact
    scopesCume = scopesCume + scopesToday

```

```

if isDiagnosis == True //get procedures incurred during diagnosis
    bloodToday = p_procsPerDiagnosis * procedureShare_BLOOD* growth
else //if not diagnosis, then it's a normal visit
    bloodToday = p_procsPerVisit * procedureShare_BLOOD* growth

bloodToday = bloodToday*disruptionImpact
bloodCume = bloodCume + bloodToday

if isDiagnosis == True //get procedures incurred during diagnosis
    stoolToday = p_procsPerDiagnosis * procedureShare_STOOL* growth
else //if not diagnosis, then it's a normal visit
    stoolToday = p_procsPerVisit * procedureShare_STOOL* growth

stoolToday = stoolToday* disruptionImpact
stoolCume = sStoolCume + toolToday

if isDiagnosis == True //get procedures incurred during diagnosis
    imageToday = p_procsPerDiagnosis * procedureShare_IMAGE* growth
else //if not diagnosis, then it's a normal visit
    imageToday = p_procsPerVisit * procedureShare_IMAGE* growth

imagingToday = imagingToday*disruptionImpact
imagingCume = imagingCume + imagingToday

```

### State of Disease Condition

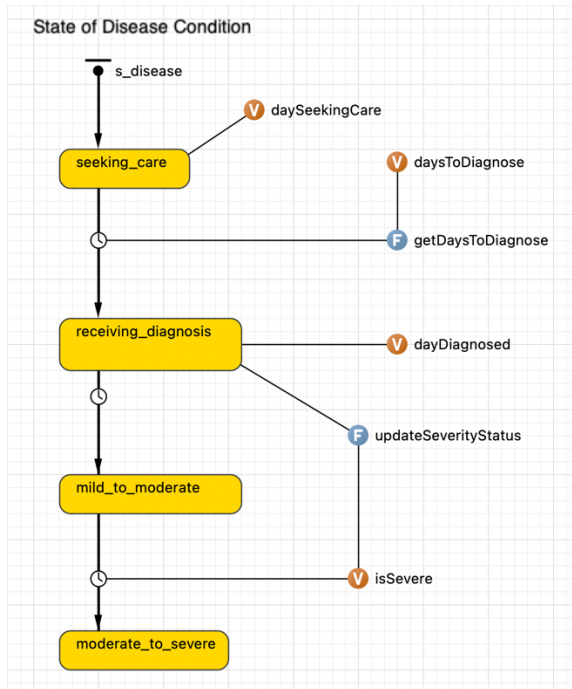

#### seeking\_care

```

daySeekingCare = simTime
demandDaysDelayDiag = (daysToDiagnose/getDisruptionEffect(disD_maxDemandVisits,
    disD_wDemandVisits)) - daysToDiagnose
supplyDaysDelayDiag = (daysToDiagnose/supplyConstraintVisits) - daysToDiagnose
daysDelayDiag = max(demandDaysDelayDiag) + max(supplyDaysDelayDiag)

transitionTime = daysDelayDiag

```

#### receiving\_diagnosis

```

dayDiagnosed = simTime

```

```

//This person starts treatment and continuous care
Generate message: "Requires CC"
Generate message: "Start Diet Treatment"

//Update severity
updateSeverityStatus()

//Procedures for diagnosis
performProcedures(true)

transitionTime = 0

mild_to_moderate
  if isSevere == True,
    then transitionTime = 0

moderate_to_severe

```

### State of Continuous Care

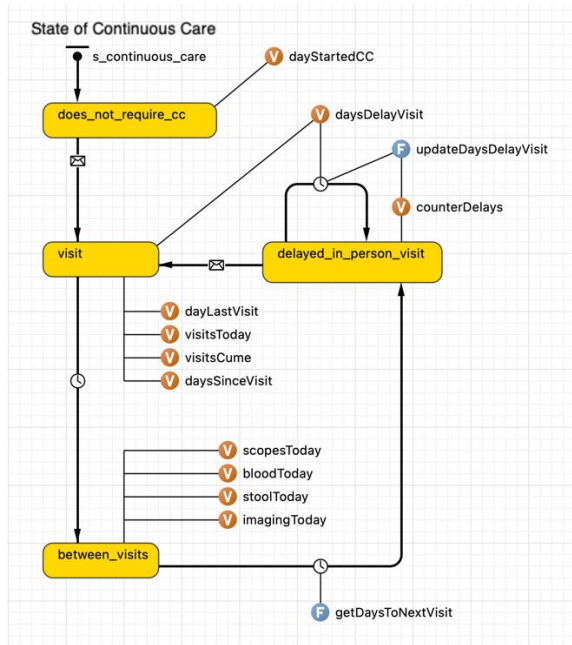

```

does_not_require_cc
  dayStartedCC = simTime

  transition on message: "Requires CC"

visit
  if dayLastVisit > 0
    then daysSinceVisit = simTime - dayLastVisit

  //Increment counters
  visitsToday++
  visitsCume++
  dayLastVisit = simTime

  //Update number of procedures performed
  //Procedures for diagnosis
  performProcedures(false)

```

```

//Reset days delay visit
daysDelayVisit = 0

transitionTime = 1

between_visits
scopesToday = 0
bloodToday = 0
stoolToday = 0
imagingToday = 0

thisDays = daysBetweenCCVisits * (1 - growthVisits)

if in the State: mild to moderate
then thisDays = thisDay*p_multVisitsIfMild

transitionTime = random number sampled from triangular distribution with
statistics:
    min = thisDays * mcLower
    max = thisDays * mcUpper
    mode = thisDays

delayed_in_person_visit
//Check if patient will be late
demandDaysDelayVisit =
    (daysBetweenCCVisits/getDisruptionEffect(disD_maxDemandVisits,
        disD_wDemandVisits)) - daysBetweenCCVisits
supplyDaysDelayVisit = (daysBetweenCCVisits/supplyConstraintVisits) -
    daysBetweenCCVisits
daysDelayVisit = min(90.0, demandDaysDelayVisit + supplyDaysDelayVisit)

if daysDelayVisit < 1.0 || counterDelays > 3
then generate message: "Go to visit"

transition on message: "Go to visit"

```

## State of Treatment: High Level

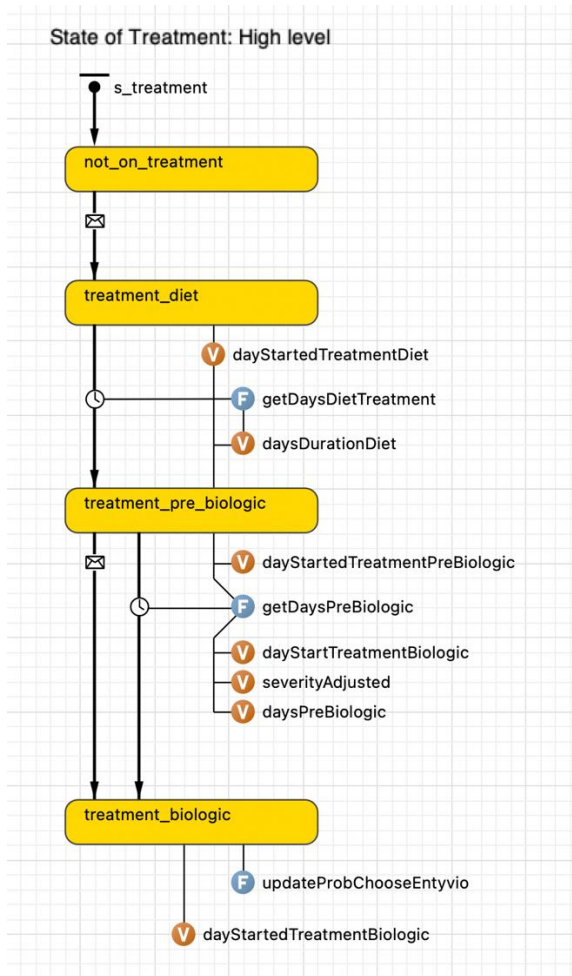

### not\_on\_treatment

transition on message: "Start Diet Treatment"

### treatment\_diet

```

dayStartedTreatmentDiet = simTime
transitionTime = daysDurationDiet

```

### treatment\_pre\_biologic

```

dayStartedTreatmentPreBiologic = simTime

```

//If the date is before biologics start, then don't start this person

```

if (severityAdjusted > p_biologicSeverityThresh)
then

```

```

//daysPreBiologic and daysDurationDiet are assumptions from the data
//the day to start bio from starting treatment is
//set to daysPreBiologic + daysDurationDiet

```

```

numDaysPreBiologic = dayStartedTreatmentDiet + daysPreBiologic +
                    daysDurationDiet - dayStartedTreatmentPreBiologic;
dayStartTreatmentBiologic = simTime + numDaysPreBiologic

```

```

transitionTime = numDaysPreBiologic
transition on message: "Start Bio"

```

```

treatment_biologic
  //Update time marker
  dayStartedTreatmentBiologic = simTime

  //Are we going to choose Vedo?
  //Uses the stock flow system on main to determine the Vedo share
  startVedo = randomTrue(probChooseVedo)

  if (startVedo)
  then generate message: "Start Vedo"
  else generate message: "Start Competitor Biologic"

```

### State of Treatment: Vedolizumab

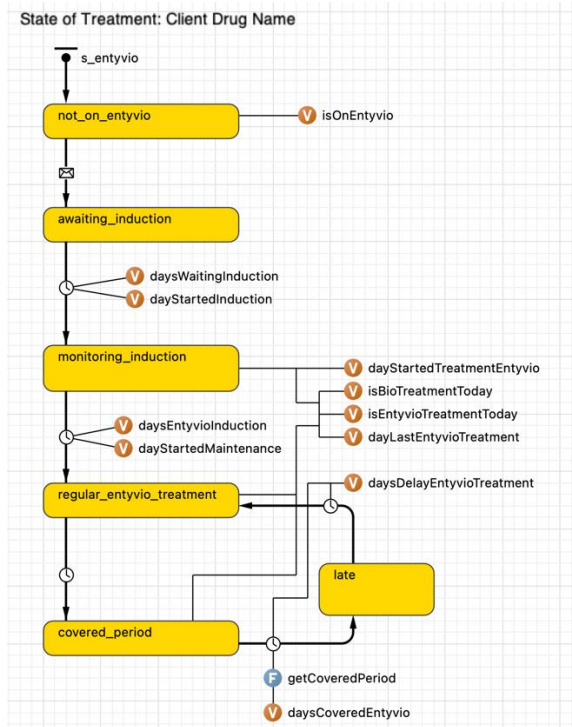

```

not_on_Vedo
  transition on message: "Start Vedo"

awaiting_induction
  isOnVedo = true
  transitionTime = daysWaitingInduction

monitoring_induction
  dayStartedInduction = simTime
  dayLastVedoTreatment = simTime
  isVedoTreatmentToday = true
  isBioTreatmentToday = true
  dayStartedTreatmentVedo = simTime

  transitionTime = daysVedoInduction

regular_Vedo_treatment
  dayStartedMaintenance = simTime
  dayLastVedoTreatment = simTime
  isVedoTreatmentToday = true
  isBioTreatmentToday = true

```

```

transitionTime = 1

covered_period
    isVedoTreatmentToday = false
    isBioTreatmentToday = false

    transitionTime = daysCoveredVedo

late
    transitionTime = max(delayDueToDemand, delayDueToSupply) - 1.0

```

### State of Treatment: Competitor Biologic

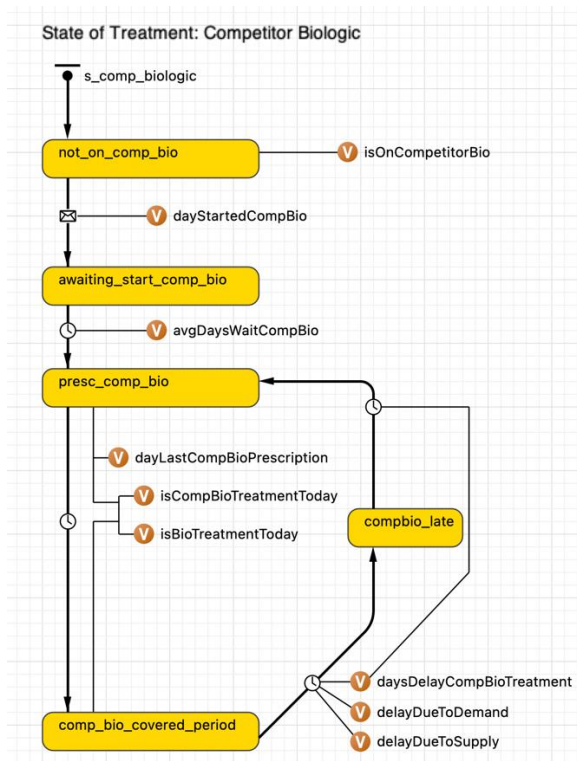

```

not_on_comp_bio
    transition on message: "Start Competitor Biologic"

```

```

awaiting_start_comp_bio
    isOnCompetitorBio = true
    dayStartedCompBio = simTime

    transitionTime = avgDaysWaitCompBio

```

```

presc_comp_bio
    //Update time of last prescription to today
    dayLastCompBioPrescription = simTime
    isCompBioTreatmentToday = true
    isBioTreatmentToday = true

    transitionTime = 1

```

```

comp_bio_covered_period
    //Record the treatment
    isCompBioTreatmentToday = false

```

```

isBioTreatmentToday = false

//Check if we're gonna be late
demandEffect = getDisruptionEffect(disD_maxDemandBio, disD_wDemandBio)
delayDueToDemand = (p_daysCompBioPrescription/demandEffect) -
p_daysCompBioPrescription
delayDueToSupply = (p_daysCompBioPrescription/supplyConstraintBio) -
p_daysCompBioPrescription
daysDelayCompBioTreatment = delayDueToDemand + delayDueToSupply
transitionTime = p_daysCompBioPrescription

compbio_late
transitionTime = daysDelayCompBioTreatment

```

## S2E.) Simulation Model Definitions

### *Variables*

|                                |          |               |
|--------------------------------|----------|---------------|
| bioStarted                     | variable | Growth        |
| bloodCume                      | variable | Patient       |
| bloodToday                     | variable | Patient.SoCC  |
| counterDelays                  | variable | Patient.SoCC  |
| createdToday                   | variable | Local         |
| dayDiagnosed                   | variable | Patient.SoDC  |
| dayLastCompBioPrescription     | variable | Patient.SoTCB |
| dayLastVedoTreatment           | variable | Patient.SoTV  |
| dayLastVisit                   | variable | Patient.SoCC  |
| daysCoveredVedo                | variable | Patient.SoTV  |
| daysDelayCompBioTreatment      | variable | Patient.SoTCB |
| daysDelayDiag                  | variable | Local         |
| daysDelayVisit                 | variable | Patient.SoCC  |
| daySeekingCare                 | variable | Patient.SoDC  |
| daysSInceVisit                 | variable | Patient.SoCC  |
| dayStartedCC                   | variable | Patient.SoCC  |
| dayStartedCompBio              | variable | Patient.SoTCB |
| dayStartedInduction            | variable | Patient.SoTV  |
| dayStartedMaintenance          | variable | Patient.SoTV  |
| dayStartedTreatmentBiologic    | variable | Patient.SoTHL |
| dayStartedTreatmentDiet        | variable | Patient.SoTHL |
| dayStartedTreatmentPreBiologic | variable | Patient.SoTHL |
| dayStartedTreatmentVedo        | variable | Patient.SoTV  |



|                                 |          |               |
|---------------------------------|----------|---------------|
| daysVedoInduction               | variable | Patient.SoTV  |
| delayDueToDemand                | variable | Patient.SoTCB |
| delayDueToSupply                | variable | Patient.SoTCB |
| demandDaysDelayDiag             | variable | Local         |
| demandDaysDelayVisit            | variable | Local         |
| demandEffect                    | variable | Local         |
| demandImpact                    | variable | Population    |
| disruptionDemandImpact          | variable | Local         |
| disruptionImpact                | variable | Local         |
| disruptionSupplyImpact          | variable | Local         |
| growth                          | variable | Local         |
| growthBio                       | variable | Growth        |
| growthProcs                     | variable | Growth        |
| growthVisits                    | variable | Growth        |
| imagingCume                     | variable | Patient       |
| imagingToday                    | variable | Patient.SoCC  |
| indicatedSupplyConstraintBio    | variable | Supply        |
| indicatedSupplyConstraintProcs  | variable | Supply        |
| indicatedSupplyConstraintVisits | variable | Supply        |
| isBioTreatmentToday             | variable | Patient.SoTV  |
| isCompBioTreatmentToday         | variable | Patient.SoTCB |
| isOnCompetitorBio               | variable | Patient.SoTCB |
| isOnVedo                        | variable | Patient.SoTV  |
| isSevere                        | variable | Patient.SoDC  |
| isVedoTreatmentToday            | variable | Patient.SoTV  |
| m_treatment_pre_biologic        | variable | Main          |
| newBiosToday                    | variable | Local         |
| numDaysPreBiologic              | variable | Local         |
| probSevere                      | variable | Patient       |
| SCAdjustmentTime                | variable | Supply        |
| scopesCume                      | variable | Patient       |
| scopesToday                     | variable | Patient.SoCC  |
| severityAdjusted                | variable | Patient       |

|                        |          |              |
|------------------------|----------|--------------|
| simTime                | variable | Main         |
| startVedo              | variable | Local        |
| stoolCume              | variable | Patient      |
| stoolToday             | variable | Patient.SoCC |
| supplyConstraintBio    | variable | Supply       |
| supplyConstraintProcs  | variable | Supply       |
| supplyConstraintVisits | variable | Supply       |
| supplyDaysDelayDiag    | variable | Local        |
| supplyDaysDelayVisit   | variable | Local        |
| thisDays               | variable | Local        |
| visitsCume             | variable | Patient.SoCC |
| visitsToday            | variable | Patient.SoCC |

### ***Parameters***

|                           |           |                   |            |            |       |        |
|---------------------------|-----------|-------------------|------------|------------|-------|--------|
| avgDaysWaitCompBio        | parameter | Patient.<br>SoTCB | Specified  | Assumed    | 7     | 7      |
| config_severityThreshold  | parameter | Main              | Calibrated | Historical | 0.87  | 0.89   |
| daysBetweenCCVisits       | parameter | Patient           | Specified  | Assumed    | 30    | 30     |
| daysDurationDiet          | parameter | Patient.<br>SoTHL | Specified  | Assumed    | 367   | 461    |
| daysPreBiologic           | parameter | Patient.<br>SoTHL | Specified  | Assumed    | 501   | 299    |
| daysToDiagnose            | parameter | Patient.<br>SoDC  | Specified  | Assumed    | 7     | 7      |
| daysWaitingInduction      | parameter | Patient.<br>SoTV  | Specified  | Assumed    | 7     | 7      |
| disD_coeffDisruption      | parameter | Population        | Calibrated | COVID      | 0.51  | 0.6    |
| disD_maxDemandBio         | parameter | Main              | Calibrated | COVID      | 0.045 | 0.095  |
| disD_maxDemandVisits      | parameter | Supply            | Calibrated | COVID      | 0.041 | 0.037  |
| disD_maxEffectNewPatients | parameter | Population        | Calibrated | COVID      | 0.11  | 0.27   |
| disD_wDemandBio           | parameter | Main              | Calibrated | COVID      | 0.45  | 0.0015 |
| disD_wDemandVisits        | parameter | Supply            | Calibrated | COVID      | 0.011 | 0.142  |
| disruptionBuildUpDelay    | parameter | Disruption        | Specified  | Scenario   |       |        |
| disruptionDissipateDelay  | parameter | Disruption        | Specified  | Scenario   |       |        |
| disS_adjustDownCS2        | parameter | Supply            | Calibrated | COVID      | 79    | 26.656 |
| disS_coeffSC2Bio          | parameter | Supply            | Calibrated | COVID      | 0.01  | 0.47   |

|                                  |           |            |            |            |            |             |
|----------------------------------|-----------|------------|------------|------------|------------|-------------|
| disS_coeffSC2Procs               | parameter | Supply     | Calibrated | COVID      | 0.004      | 0.078       |
| disS_coeffSC2Visits              | parameter | Supply     | Calibrated | COVID      | 0.012      | 0.003       |
| disS_consSC2Bio                  | parameter | Supply     | Calibrated | COVID      | 4.642      | 41.1        |
| disS_consSC2Procs                | parameter | Supply     | Calibrated | COVID      | 0.968      | 1.76        |
| disS_consSC2Visits               | parameter | Supply     | Calibrated | COVID      | 1.52       | 3.14        |
| disS_delayWaitingFor<br>Impact   | parameter | Supply     | Calibrated | COVID      | 12.42<br>6 | 64.5        |
| disS_durationRecovery            | parameter | Supply     | Calibrated | COVID      | 61.56<br>8 | 31.725      |
| disS_recoveryTime                | parameter | Supply     | Specified  | Scenario   |            |             |
| disS_startTime                   | parameter | Supply     | Specified  | Scenario   |            |             |
| growthBio_maxIncrease            | parameter | Growth     | Calibrated | Historical | 0.33       | 0.7         |
| growthBio_rateIncrease           | parameter | Growth     | Calibrated | Historical | 0.386      | 0.73        |
| growthBio_year                   | parameter | Growth     | Calibrated | Historical | 40         | 40.5        |
| growthProcs_maxIncrease          | parameter | Growth     | Calibrated | Historical | 0          | 0.49        |
| growthProcs_rateIncrease         | parameter | Growth     | Calibrated | Historical | 0.24       | 0.33        |
| growthProcs_year                 | parameter | Growth     | Calibrated | Historical | 41         | 40.46       |
| growthVisits_maxIncrease         | parameter | Growth     | Calibrated | Historical | 0.51       | 0.39        |
| growthVisits_rateIncrease        | parameter | Growth     | Calibrated | Historical | 0.729      | 0.5         |
| growthVisits_year                | parameter | Growth     | Calibrated | Historical | 40.02      | 40.8        |
| mcLower                          | parameter | Patient    | Specified  | Assumed    | 0.8        | 0.8         |
| mcUpper                          | parameter | Patient    | Specified  | Assumed    | 1.2        | 1.2         |
| p_biologicSeverityThresh         | parameter | Main       | Calibrated | Historical | 0.938      | 0.755       |
| p_daysCompBioPrescription        | parameter | Main       | Calibrated | Historical | 67.50<br>3 | 70          |
| p_multVisitsIfMild               | parameter | Main       | Calibrated | Historical | 0.57       | 0.602       |
| p_procsPerDiagnosis              | parameter | Main       | Calibrated | Historical | 2.54       | 2.536       |
| p_procsPerVisit                  | parameter | Main       | Calibrated | Historical | 0.57       | 0.602       |
| p_severitySevereThreshold        | parameter | Main       | Calibrated | Historical | 0.805      | 0.782       |
| pop_avgDaysBeforeSeekingC<br>are | parameter | Population | Calibrated | Historical | 14         | 14          |
| pop_leaveScopeBaseline           | parameter | Population | Calibrated | Historical | 0.001      | 0.001       |
| pop_maxIncrease                  | parameter | Population | Calibrated | Historical | 6.277      | 4.641       |
| pop_newSymptomaticPerDay         | parameter | Population | Calibrated | Historical | 0.055      | 0.0083      |
| pop_probAdaptIgnore              | parameter | Population | Calibrated | Historical | 0          | 0           |
| pop_rateIncrease                 | parameter | Population | Calibrated | Historical | 0.12       | 0.1965<br>7 |

|                      |           |                   |            |                       |                |                |
|----------------------|-----------|-------------------|------------|-----------------------|----------------|----------------|
| probChooseVedo       | parameter | Patient.<br>SoTHL | Specified  | Assumed               | 0.277          | 0.277          |
| procedureShare_BLOOD | parameter | Main              | Calibrated | Historical            | 0.45           | 0.45           |
| procedureShare_IMAGE | parameter | Main              | Calibrated | Historical            | 0.09           | 0.09           |
| procedureShare_SCOPE | parameter | Main              | Calibrated | Historical            | 0.25           | 0.25           |
| procedureShare_STOOL | parameter | Main              | Calibrated | Historical            | 0.21           | 0.21           |
| severity             | parameter | Patient           | Specified  | Behavior<br>Predictor | per<br>Patient | per<br>Patient |

### ***Stocks & Flows***

| Name                 | Type  | Location   | Initial Condition:<br>Jan 1, 2020 | Initial Conditions:<br>Jan 1, 2020 |
|----------------------|-------|------------|-----------------------------------|------------------------------------|
|                      |       |            | Tokyo                             | Hokkaido                           |
| all_patients         | stock | Population | 3554                              | 647                                |
| cume_new_patients    | stock | Population | 0                                 | 0                                  |
| disrupted_stopped    | stock | Population | 0                                 | 0                                  |
| disruption           | stock | Disruption | 0                                 | 0                                  |
| new_adapts           | flow  | Population | NA                                | NA                                 |
| new_bio_patients     | stock | Growth     | 0                                 | 0                                  |
| new_patients         | flow  | Population | NA                                | NA                                 |
| new_seeking_care     | flow  | Population | NA                                | NA                                 |
| new_symptomatic      | flow  | Population | NA                                | NA                                 |
| out_flow             | flow  | Population | NA                                | NA                                 |
| potential_disruption | stock | Disruption | Scenarios: Total<br>Magnitude     | Scenarios: Total<br>Magnitude      |
| symptomatic          | stock | Population | 27                                | 5                                  |

### ***Function Arguments***

|             |          |       |
|-------------|----------|-------|
| coeff       | argument | Local |
| isDiagnosis | argument | Local |
| isUC        | argument | Local |
| maxEffect   | argument | Local |

## Interventions

|                                |          |        |           | Source   | NATIONAL<br>CONFIDENCE<br>BUILDING | SYSTEM<br>SOCIAL<br>SIGNALING | PHYSICIAN<br>OUTREACH | EMERGENCY<br>RESPONSE<br>INFRASTRUCTURE | BARRIER<br>ELIMINATION | SIMPLE<br>NAVIGATION<br>ASSISTANCE |
|--------------------------------|----------|--------|-----------|----------|------------------------------------|-------------------------------|-----------------------|-----------------------------------------|------------------------|------------------------------------|
| demandIntervention<br>Patients | variable | Main   | Specified | Scenario | 0.4                                | 0.6                           | 0.85                  | 0.45                                    | 0.4                    | 0.85                               |
| demandInterventionBio          | variable | Main   | Specified | Scenario | 0.4                                | 0.6                           | 0.85                  | 0.45                                    | 0.4                    | 0.85                               |
| demandIntervention<br>Visits   | variable | Main   | Specified | Scenario | 0.4                                | 0.6                           | 0.85                  | 0.45                                    | 0.4                    | 0.85                               |
| supplyIntervention<br>Bio      | variable | Supply | Specified | Scenario | 1                                  | 1                             | 1                     | 0.4                                     | 0.4                    | 0.95                               |
| supplyIntervention<br>Procs    | variable | Supply | Specified | Scenario | 1                                  | 1                             | 1                     | 0.4                                     | 0.4                    | 0.95                               |
| supplyIntervention<br>Visits   | variable | Supply | Specified | Scenario | 1                                  | 1                             | 1                     | 0.4                                     | 0.4                    | 0.95                               |

## Messages

|                             |         |               |
|-----------------------------|---------|---------------|
| "Go to visit"               | message | Patient.SoCC  |
| "Requires CC"               | message | Patient.SoDC  |
| "Return to before impact"   | message | Supply        |
| "Start Bio"                 | message | Growth        |
| "Start Competitor Biologic" | message | Patient.SoTHL |
| "Start Diet Treatment"      | message | Patient.SoDC  |
| "Start Supply Disruption"   | message | Supply        |
| "Start Vedo"                | message | Patient.SoTHL |

## S2F.) Simulation Model Input/Output Data and Scenario Settings

A list of data used as input during simulation runs can be found in Supplemental Table S1

A list of model output generated during simulation runs can be found in Supplemental Table S2

## Supplemental References

1. Kumar, M.; Garand, M.; Al Khodor, S. Integrating omics for a better understanding of Inflammatory Bowel Disease: a step towards personalized medicine. *Journal of Translational Medicine*, **2019**, 17, 419.
2. Abegunde, A.T.; Muhammad, B.H.; Bhatti, O.; Ali T. Environmental risk factors for inflammatory bowel diseases: evidence based literature review. *World J Gastroenterol* **2016**, 22(27), 6296–6317.
